# Supplementary material for: Changing patterns in Health-seeking behavior and prescription practices for treatment of hypertension in nine districts – insights from India Hypertension Control Initiative, 2018-19 and 2023-24
Source: Research Square preprint supplement (doi:10.21203/rs.3.rs-6801552/v1), 2025-06-23
Supplement: Supplementary file 1 [file 750574697eccc2f3a1a7c059.docx]

| **Supplementary Table 1: Characteristics of individuals who are aware and treated for hypertension participated in baseline (2018-19) and follow-up (2023-24) survey in five Phase I states of IHCI** | | | | | | | | | | | |
| --- | --- | --- | --- | --- | --- | --- | --- | --- | --- | --- | --- |
| **Demographic characteristics** | | **Punjab** | | **Madhya Pradesh** | | **Maharashtra** | | **Telangana** | | **Kerala** | |
| **Baseline (N = 847)** | **Follow up (N = 693)** | **Baseline (N = 250)** | **Follow up (N = 432)** | **Baseline (N = 223)** | **Follow up (N = 316)** | **Baseline (N = 654)** | **Follow up (N = 878)** | **Baseline (N = 899)** | **Follow up (N = 957)** |
| **Gender** | Male | 250 (30%) | 198 (29%) | 77 (31%) | 172 (40%) | 84 (38%) | 121 (38%) | 233 (36%) | 301 (34%) | 280 (31%) | 311 (33%) |
|  | Female/T | 597 (71%) | 495 (71%) | 173 (69%) | 260 (60%) | 139 (62%) | 195 (62%) | 421 (64%) | 577 (66%) | 619 (69%) | 646 (68%) |
| **Baseline Age** | <45 | 219 (26%) | 119 (17%) | 43 (17%) | 90 (21%) | 29 (13%) | 32 (10%) | 79 (12%) | 93 (11%) | 53 (6%) | 39 (4%) |
|  | 45-59 | 378 (45%) | 289 (42%) | 111 (44%) | 193 (45%) | 85 (38%) | 140 (44%) | 262 (40%) | 406 (46%) | 392 (44%) | 388 (41%) |
|  | >=60 | 250 (30%) | 285 (41%) | 96 (38%) | 165 (38%) | 109 (49%) | 144 (46%) | 313 (48%) | 379 (43%) | 454 (51%) | 530 (55%) |
| **Baseline Education** | No formal schooling | 203 (24%) | 187 (27%) | 90 (36%) | 134 (31%) | 38 (17%) | 35 (11%) | 416 (64%) | 513 (58%) | 39 (4%) | 31 (3%) |
|  | Middle to High school (upto 10) | 498 (59%) | 382 (55%) | 111 (44%) | 194 (45%) | 111 (50%) | 169 (54%) | 192 (29%) | 296 (34%) | 690 (77%) | 658 (69%) |
|  | Secondary & above | 146 (17%) | 124 (18%) | 49 (20%) | 102 (24%) | 74 (33%) | 111 (35%) | 46 (7%) | 69 (8%) | 170 (19%) | 268 (28%) |
| **Follow up Occupation** | Professional/Business/Senior Executive | 112 (13%) | 79 (11%) | 46 (18%) | 88 (20%) | 41 (19%) | 54 (17%) | 93 (14%) | 107 (12.2%) | 83 (9%) | 138 (14%) |
|  | Agriculural land owner | 32 (4%) | 39 (6%) | 16 (6%) | 36 (8%) | 17 (8%) | 53 (17%) | 94 (14%) | 116 (13%) | 13 (1%) | 9 (1%) |
|  | Skilled/Unskilled Manual Labourer | 71 (8%) | 54 (8%) | 27 (5%) | 80 (19%) | 39 (18%) | 67 (21%) | 190 (29%) | 281 (32%) | 141 (16%) | 177 (19%) |
|  | Homemaker/Students | 561 (66%) | 470 (68%) | 150 (60%) | 185 (43%) | 101 (45%) | 106 (34%) | 126 (19%) | 275 (31%) | 529 (59%) | 471 (49%) |
|  | Others (Retired/Umemployed) | 71 (8%) | 51 (7%) | 11 (4%) | 43 (10%) | 25 (11%) | 36 (11%) | 151 (23%) | 99 (11%) | 133 (15%) | 162 (17%) |
| **BMI** | <18.50 Under Weight | 20 (2%) | 18 (3%) | 10 (4%) | 17 (4%) | 8 (4%) | 9 (3%) | 28 (4%) | 30 (3%) | 12 (1%) | 19 (2%) |
|  | 18.50-24.99 Normal | 244 (29%) | 244 (35%) | 108 (43%) | 193 (45%) | 93 (42%) | 125 (40%) | 276 (42%) | 348 (40%) | 365 (41%) | 345 (36%) |
|  | 25.00-29.99 Pre_obese | 302 (36%) | 253 (37%) | 87 (35%) | 149 (34%) | 92 (41%) | 130 (41%) | 245 (37%) | 332 (38%) | 360 (40%) | 425 (44%) |
|  | >=30.00 Obese | 281 (33%) | 178 (26%) | 45 (18%) | 73 (17%) | 30 (13%) | 52 (16%) | 105 (16%) | 168 (19%) | 162 (18%) | 168 (18%) |

| **Supplementary table 2: Availability of special card, no. of days of prescription, user fee, payment for HT medication reported by individuals aware and on treatment for hypertension in government health facilities, participated in baseline (2018-19) and follow up survey (2023-24), five Phase I states, IHCI** | | | | | | | | | | | | | |
| --- | --- | --- | --- | --- | --- | --- | --- | --- | --- | --- | --- | --- | --- |
|  |  | **Availability of special card in government health facility** | | **No. of days of prescription of HT medication** | | | | | | **User fee for recent health facility visit** | | **Payment for HT medication during recent visit** | |
|  |  |  |  | **< 1 month** | | **1 month** | | **> 1 month** | | **Govt** | | **Govt** | |
|  |  | **n** | **%** | **n** | **%** | **n** | **%** | **n** | **%** | **n** | **%** | **n** | **%** |
| Punjab | Baseline (N=95) | 10 | 11 | 60 | 63 | 31 | 33 | 4 | 4 | 55 | 58 | 60 | 63 |
|  | Follow up (N=167) | 68 | 41 | 50 | 30 | 109 | 65 | 8 | 5 | 6 | 4 | 10 | 6 |
| Madhya Pradesh | Baseline (N=53) | 21 | 40 | 16 | 30 | 32 | 60 | 5 | 9 | 16 | 30 | 11 | 21 |
|  | Follow up (N=175) | 120 | 69 | 38 | 22 | 126 | 72 | 11 | 6 | 12 | 7 | 9 | 5 |
| Maharashtra | Baseline (N=39) | 23 | 59 | 8 | 21 | 30 | 77 | 1 | 3 | 6 | 15 | 4 | 10 |
|  | Follow up (N=105) | 90 | 86 | 21 | 20 | 81 | 77 | 3 | 3 | 13 | 12 | 16 | 15 |
| Telangana | Baseline (N=94) | 32 | 34 | 12 | 13 | 79 | 84 | 3 | 3 | 12 | 13 | 6 | 6 |
|  | Follow up (N=230) | 173 | 75 | 25 | 11 | 199 | 87 | 6 | 3 | 32 | 14 | 28 | 12 |
| Kerala | Baseline (N=307) | 170 | 55 | 36 | 12 | 266 | 87 | 5 | 2 | 96 | 31 | 195 | 64 |
|  | Follow up (N=364) | 232 | 64 | 36 | 10 | 310 | 85 | 18 | 5 | 27 | 7 | 32 | 9 |
| Overall | Baseline (N=588) | 256 | 44 | 132 | 22 | 438 | 74 | 18 | 3 | 185 | 31 | 276 | 47 |
|  | Follow up (N=1041) | 683 | 66 | 170 | 16 | 825 | 79 | 46 | 4 | 90 | 9 | 95 | 9 |
